# Supplementary material for: A Dual-Signaling Electrochemical Aptasensor Based on an In-Plane Gold Nanoparticles–Black Phosphorus Heterostructure for the Sensitive Detection of Patulin
Source: MDPI journal article supplement (doi:10.3390/foods12040846), 2023-02-16
Supplement: s1 [file s1]

## Supporting Information

# A Dual-Signaling Electrochemical Aptasensor Based on an In-Plane Gold Nanoparticles–Black Phosphorus Heterostructure for the Sensitive Detection of Patulin

Jinqiong Xu <sup>1</sup>, Jianbo Liu <sup>1</sup>, Wuwu Li <sup>1</sup>, Yongsheng Wei <sup>1</sup>, Qinglin Sheng <sup>2,3,\*</sup>  
and Yonghui Shang <sup>1,\*</sup>

<sup>1</sup> College of Chemistry and Chemical Engineering, Xianyang Normal University, Xianyang 712000, China

<sup>2</sup> College of Food Science and Technology, Northwest University, Xi'an 710069, China

<sup>3</sup> Laboratory of Nutritional and Healthy Food-Individuation Manufacturing Engineering/Research Center of Food Safety Risk Assessment and Control, Xi'an 710069, China

\* Correspondence: qlsheng@nwu.edu.cn (Q.S.); shangyh@xync.edu.cn (Y.S.)

## Supplementary details

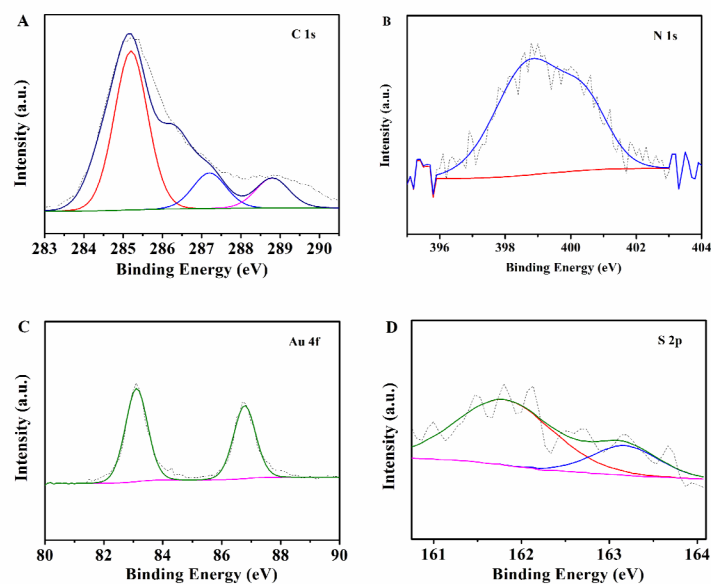

**Figure S1.** High-resolution XPS spectra for (A) C 1 s, (B) N 1 s, (C) Au 4f, and (D) S 2p regions collected from aptamer compound AuNPs-BPNS.

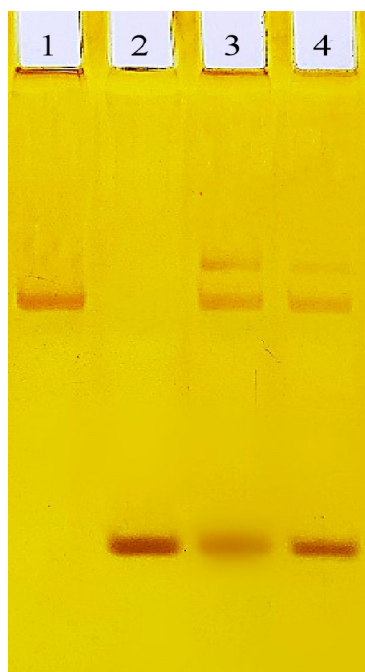

**Figure S2.** PAGE images of different DNAs. Lane 1, aptamer; Lane 2, cDNA; Lane 3, hybridization of aptamer and cDNA; Lane 4, hybridization of aptamer and cDNA treated with PAT.

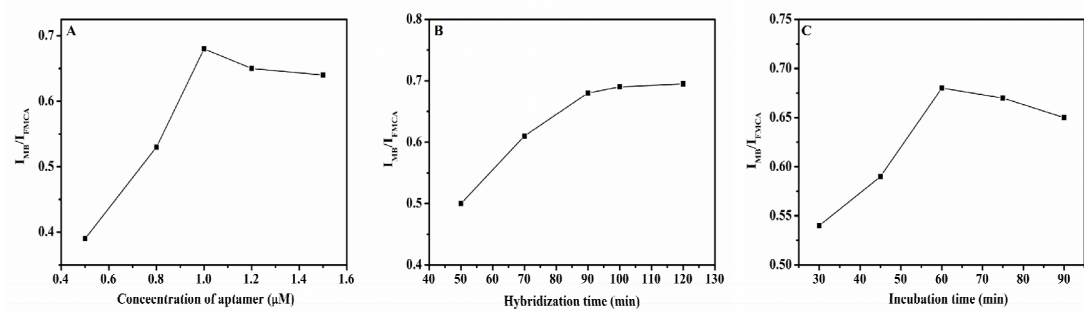

**Figure S3.** Optimization of the concentration of aptamer (A), the hybridization time of aptamer and cDNA (B) and the incubation time of PAT (C) for the PAT (154 ng/mL) detection.
